# Supplementary material
Source: ML conference proceedings conference paper supplement (https://proceedings.neurips.cc/paper_files/paper/2016/hash/f39ae9ff3a81f499230c4126e01f421b-Abstract.html)
Supplement: Supplementary file [file f39ae9ff3a81f499230c4126e01f421b-Supplemental.zip]

---

# Lifelong Learning with Weighted Majority Votes: Supplementary Material

---

**Anastasia Pentina**  
IST Austria  
apentina@ist.ac.at

**Ruth Urner**  
Max Planck Institute for Intelligent Systems  
rurner@tuebingen.mpg.de

In this document we provide the proofs omitted from the main manuscript.

## 1 Properties of $d_D(\mathcal{H}, \mathcal{H}')$

**Claim 1.** *The distance  $d_D(\mathcal{H}, \mathcal{H}')$  between two hypothesis sets satisfies the triangle inequality  $d_D(\mathcal{H}_1, \mathcal{H}_3) \leq d_D(\mathcal{H}_1, \mathcal{H}_2) + d_D(\mathcal{H}_2, \mathcal{H}_3)$ .*

*Proof.*

for any  $h_1 \in \mathcal{H}_1$ :

$$\begin{aligned} d_D(h_1, \mathcal{H}_3) &= \min_{h_3 \in \mathcal{H}_3} d_D(h_1, h_3) \\ &\leq \min_{h_3 \in \mathcal{H}_3} (d_D(h_1, h_2) + d_D(h_2, h_3)) \forall h_2 \in \mathcal{H}_2 \\ &= d_D(h_1, h_2) + \min_{h_3 \in \mathcal{H}_3} d_D(h_2, h_3) \forall h_2 \in \mathcal{H}_2 \\ &= d_D(h_1, h_2) + d_D(h_2, \mathcal{H}_3) \forall h_2 \in \mathcal{H}_2 \\ &\leq d_D(h_1, h_2) + d_D(\mathcal{H}_2, \mathcal{H}_3) \forall h_2 \in \mathcal{H}_2 \end{aligned}$$

by minimizing over  $h_2$ :

$$d_D(h_1, \mathcal{H}_3) \leq d_D(h_1, \mathcal{H}_2) + d_D(\mathcal{H}_2, \mathcal{H}_3)$$

by maximizing over  $h_1$  on the right hand side:

$$d_D(h_1, \mathcal{H}_3) \leq d_D(\mathcal{H}_1, \mathcal{H}_2) + d_D(\mathcal{H}_2, \mathcal{H}_3)$$

by maximizing over  $h_1$  on the left hand side:

$$d_D(\mathcal{H}_1, \mathcal{H}_3) \leq d_D(\mathcal{H}_1, \mathcal{H}_2) + d_D(\mathcal{H}_2, \mathcal{H}_3).$$

□

## 2 Proof of Lemma 2

We will prove the statement by induction on  $k$  over a stronger statement that the conclusion holds for  $V_k = \text{MV}(w_1, \dots, w_l, h_1, \dots, h_k)$  and  $\tilde{V}_k = \text{MV}(w_1, \dots, w_l, \tilde{h}_1, \dots, \tilde{h}_k)$  for any  $w_1, \dots, w_l$ . Note that for  $k = 1$  the statement follows from Lemma 1.

Let  $V'_k = \text{MV}(w_1, \dots, w_l, h_1, \dots, h_{k-1}, \tilde{h}_k)$ . Then:

$$\begin{aligned} d_D(V_k, \tilde{V}_k) &\leq d_D(V_k, V'_k) + d_D(V'_k, \tilde{V}_k) \quad (\text{by triangle inequality}) \\ &\leq d_D(h_k, \tilde{h}_k) + d_D(V'_k, \tilde{V}_k) \quad (\text{by Lemma 1}) \\ &\leq \epsilon_k + \sum_{i=1}^{k-1} \epsilon_i \quad (\text{by assumption and induction}). \end{aligned}$$

### 3 Proof of Theorem 3

1. First, as in the proof of Theorem 2, we need to control the total probability of any conclusion of Algorithm 2 being incorrect. For every task  $i = 2, \dots, n$  Algorithm 2 preforms at most two estimations. Therefore the total probability of failure is:

$$\delta_1 + \sum_{i=2}^n 2\delta_i = \frac{\delta}{2} + \sum_{l=1}^{\lfloor \log n \rfloor} 2(2^{l+1} - 2^l) \frac{\delta}{2^{2l+2}} = \frac{\delta}{2} + \frac{\delta}{2} \sum_{l=1}^{\lfloor \log n \rfloor} \frac{1}{2^l} \leq \frac{\delta}{2} + \frac{\delta}{2} \sum_{l=1}^{\infty} \frac{1}{2^l} = \frac{\delta}{2} + \frac{\delta}{2} = \delta.$$

2. Performance guarantees follow from the design of the algorithm (as in Theorem 2).

3. The fact that  $\tilde{k} \leq k$  can be proven in a way analogous to Theorem 2. However, we need to make sure that for every  $\hat{k} = 1, \dots, \tilde{k}$ , by using Lemma 2, we will obtain a suitable result. In particular, by construction for every  $j = 1, \dots, \hat{k} - 1$   $d_{D_{i_{\hat{k}}}}(h_{i_j}^*, \tilde{h}_j) \leq \epsilon'_j$ . Therefore by Lemma 2:

$$d_{D_{i_{\hat{k}}}}(MV(h_{i_1}^*, \dots, h_{i_{\hat{k}-1}}^*), MV(\tilde{h}_1, \dots, \tilde{h}_{\hat{k}-1})) \leq (\hat{k} - 1)\xi + \sum_{j=1}^{\hat{k}-1} \epsilon'_j. \quad (1)$$

By the definition of  $\epsilon'_j$ :

$$\sum_{j=1}^{\hat{k}-1} \epsilon'_j \leq \frac{\epsilon}{16} + \sum_{m=1}^{\lfloor \hat{k} \rfloor} (2^{m+1} - 2^m) \frac{\epsilon}{2^{2m+4}} = \frac{\epsilon}{16} + \frac{\epsilon}{16} \sum_{m=1}^{\lfloor \hat{k} \rfloor} \frac{1}{2^m} < \frac{\epsilon}{16} + \frac{\epsilon}{16} = \frac{\epsilon}{8}.$$

Together with the assumption on discrepancies, this guarantees that:

$$d_{D_{i_{\hat{k}}}}(MV(h_{i_1}^*, \dots, h_{i_{\hat{k}-1}}^*), MV(\tilde{h}_1, \dots, \tilde{h}_{\hat{k}-1})) \leq \frac{\epsilon}{4}, \quad (2)$$

which is exactly what is needed to come to contradiction.

4. The sample complexity of Algorithm 2 consists of the same parts as that of Algorithm 1.

The first difference comes from the fact that  $\delta'$  changes over time, because the algorithm does not know the total number of tasks. However, the smallest value it attains is  $\delta/(4n^2)$  and, since the dependence of the sample complexity on the  $\delta$  is only logarithmic, it does not change the result significantly.

The second difference is that also  $\epsilon'$  changes over time, because the algorithm does not know the parameter  $k$  in advance. This influences the sample complexity of learning "base tasks". In order to control it we need to control the following sum:

$$\sum_{j=1}^{\tilde{k}} \frac{1}{\epsilon'_j} \leq \sum_{m=1}^{\lfloor \log k \rfloor} (2^{m+1} - 2^m) \frac{2^{2m+4}}{\epsilon} = \frac{16}{\epsilon} \sum_{m=1}^{\lfloor \log k \rfloor} 2^{3m} \leq \frac{k^3 \log k}{\epsilon}.$$

Therefore the complexity of learning the "base tasks" is:

$$\tilde{O}\left(\frac{\text{VC}(\mathcal{H})k^3}{\epsilon}\right). \quad (3)$$
